# Supplementary material for: Physical mechanisms for biological carbon uptake during the onset of the spring phytoplankton bloom in the northwestern Mediterranean Sea (BOUSSOLE site)
Source: Copernicus journal article supplement (doi:10.5194/bg-2021-315), 2021-11-26

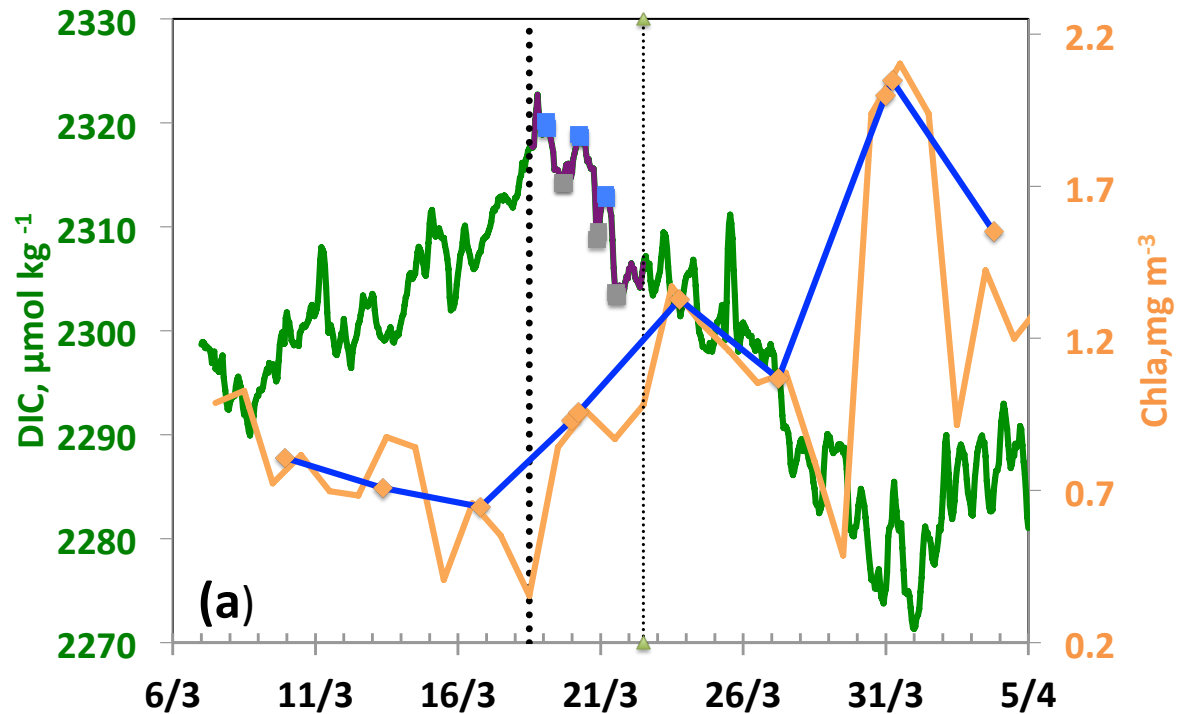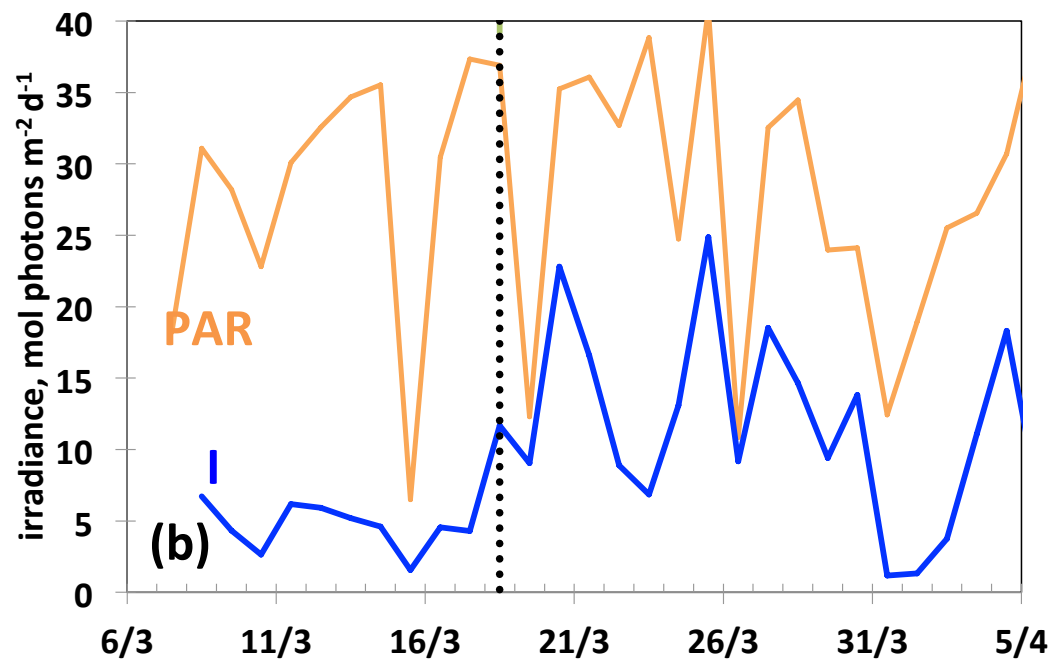

Supplement: Supplementary file [file bg-2021-315-AC2-supplement.pdf]
